# Supplementary material
Source: PubMed Central journal article supplement (PMC4800067)
Supplement: NIHMS758064-supplement-supplement_1.pdf [file NIHMS758064-supplement-supplement_1.pdf]

Supplementary Figures:

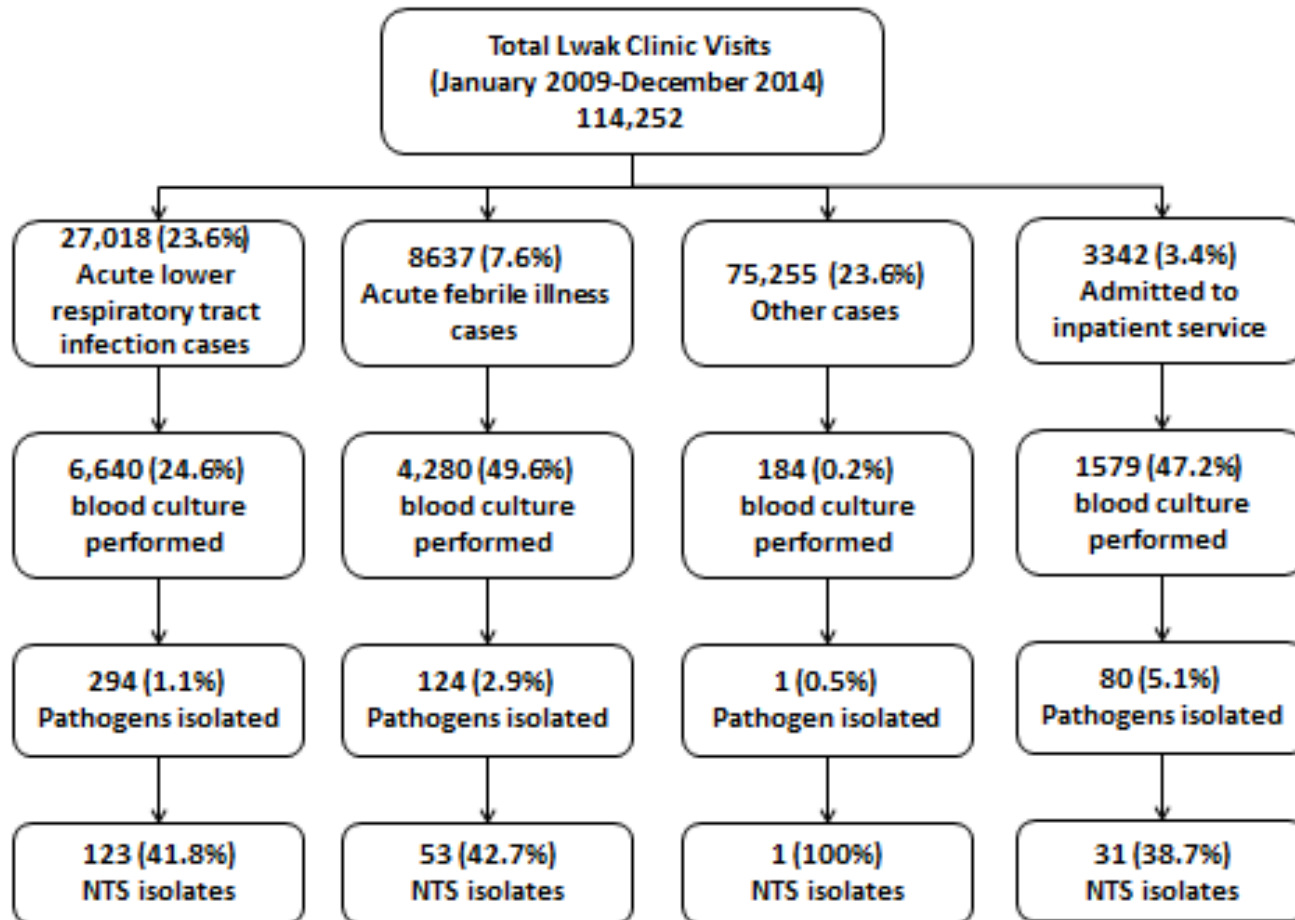

Supplementary Figure 1: Flow chart showing numbers of enrollees from Lwak, blood cultures processed and pathogens isolated, including NTS isolated

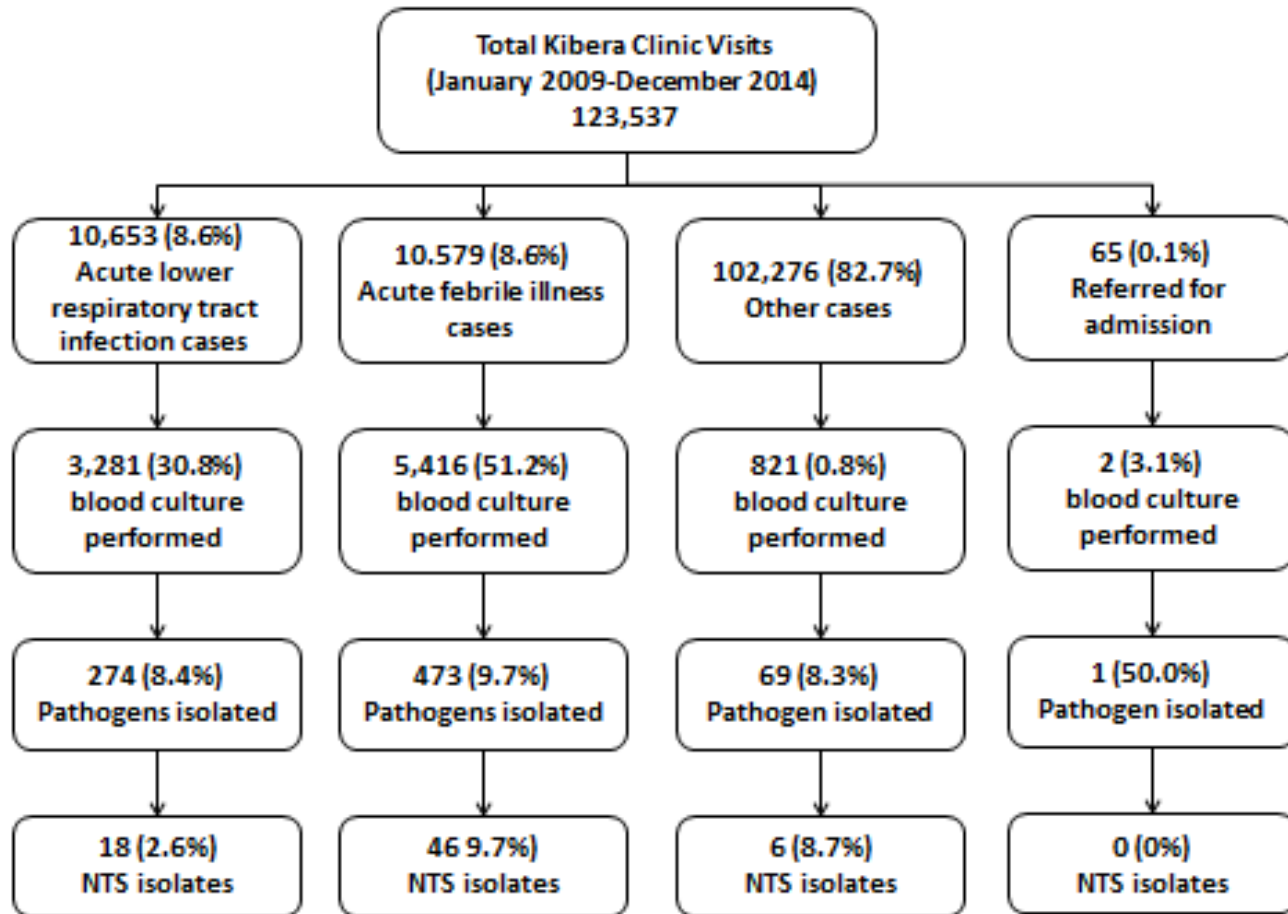

Supplementary Figure 2: Flow chart showing numbers of enrollees from Kibera, blood cultures processed and pathogens isolated, including NTS isolated
